# Supplementary material for: Unraveling the phenotypic and metabolic responses induced by urea-encapsulated hydrogel beads on Brassica juncea (L.) Czern & Coss
Source: Royal Society of Chemistry journal article supplement (doi:10.1039/d4mo00192c), 2025-01-28
Supplement: d4mo00192c8.pdf [file d4mo00192c8.pdf]

### Supplementary Data File

#### Unraveling the phenotypic and metabolic responses induced by urea-encapsulated hydrogel beads on *Brassica juncea* (L.) Czern & Coss.

Balakrishnan Muthumari<sup>1,2</sup>, Balasubramanian Vignesh Kumar<sup>2</sup>, Murugan Kavitha<sup>1</sup>, John Kennedy John Praveen Kumar<sup>1</sup>, Subashri Dhanasekaran<sup>2</sup>, Shih – Feng Fu<sup>2</sup>, Shang-Tse Ho, Muthuramalingam Jothi Basu<sup>3\*</sup> and Jui-Yu Chou<sup>2\*</sup>

<sup>1</sup>Department of Botany, Alagappa University, Karaikudi, 630 003, India

<sup>2</sup>Department of Biology, National Changhua University of Education, Changhua 500, Taiwan

<sup>3</sup>Department of Wood Based Materials and Design, College of Agriculture, National Chiayi University, Chiayi 600, Taiwan

<sup>4</sup>Centre for Distance and Online Education, Alagappa University, Karaikudi, 630 003, India

\*Equal Contribution (Corresponding Author: [jothibasum@alagappauniversity.ac.in](mailto:jothibasum@alagappauniversity.ac.in), [jackyjau@cc.ncue.edu.tw](mailto:jackyjau@cc.ncue.edu.tw))

---

#### **S. Table1: List of metabolites identified through LC-MS analysis**

| Sl. no | Identified Compounds         | Control | Urea  | HBWU  | HBWOU |
|--------|------------------------------|---------|-------|-------|-------|
| 1      | L-Glutamine                  | 6800    | 4500  | 5900  | 3000  |
| 2      | L-Glutamate                  | 0       | 20000 | 24000 | 0     |
| 3      | N-Carbamyl-L-glutamate       | 3900    | 5800  | 5600  | 2600  |
| 4      | 2-Oxoglutarate               | 4500    | 4700  | 4300  | 4400  |
| 5      | NAD+                         | 0       | 10000 | 2100  | 0     |
| 6      | NADP+                        | 0       | 0     | 10000 | 0     |
| 7      | NADPH                        | 3000    | 0     | 9200  | 6000  |
| 8      | ATP                          | 37000   | 23000 | 14000 | 34000 |
| 9      | ADP                          | 8100    | 2800  | 3400  | 4500  |
| 10     | NADH                         | 4900    | 2200  | 2800  | 2700  |
| 11     | Carboxyphosphate             | 13000   | 12000 | 14000 | 16000 |
| 12     | Carbamoyl phosphate          | 3300    | 2700  | 3000  | 4200  |
| 13     | D-Glucosamine 6-phosphate    | 4200    | 4300  | 3800  | 4500  |
| 14     | 5-Phosphoribosylamine        | 0       | 4400  | 9000  | 0     |
| 15     | 2-Oxoglutaramate             | 5900    | 6800  | 5300  | 3000  |
| 16     | 5'-Phosphoribosylglycinamide | 0       | 4700  | 12000 | 0     |
| 17     | Deoxyinosine                 | 0       | 4700  | 4100  | 0     |

## Supplementary Data File

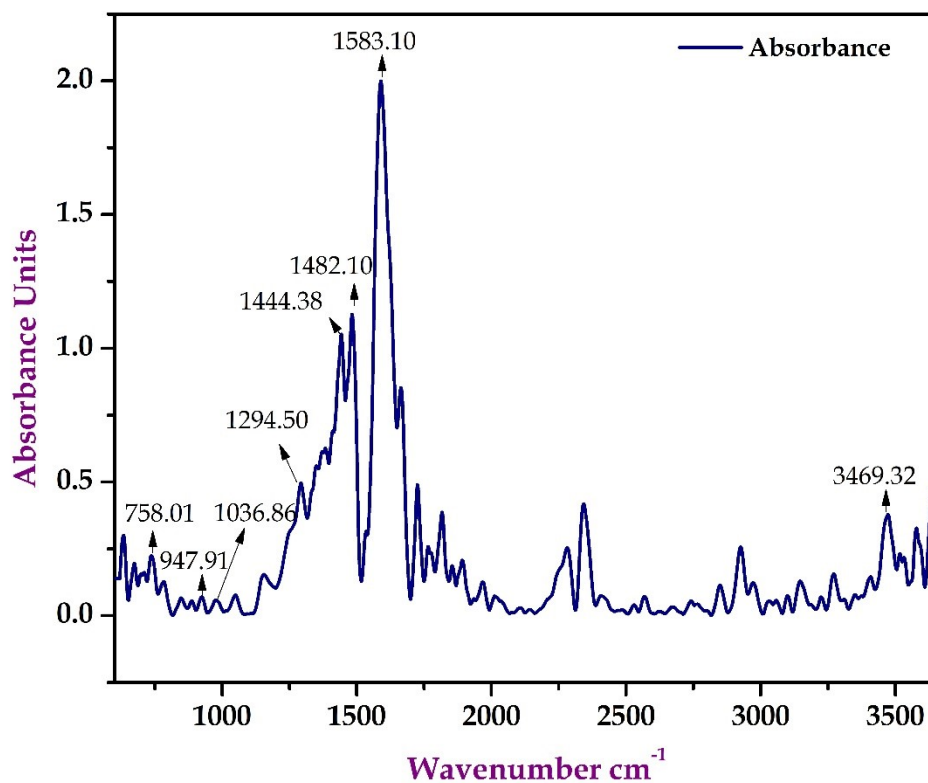

SF 1: FT - IR spectra of urea encapsulated GXG-SA hydrogel beads

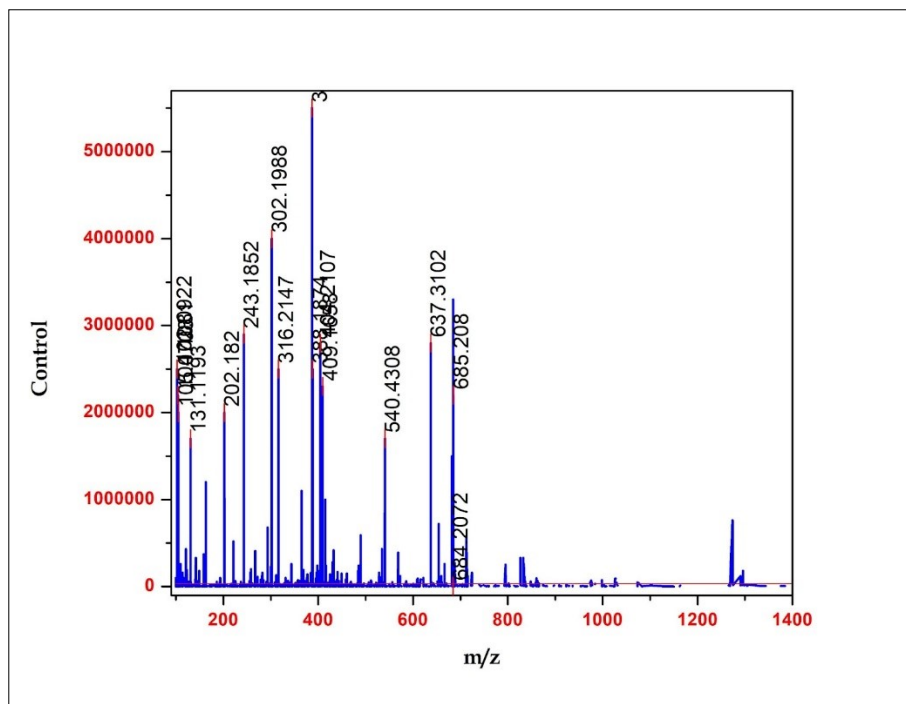

SF 2: TIC of an intra-cellular metabolite of control plants

Supplementary Data File

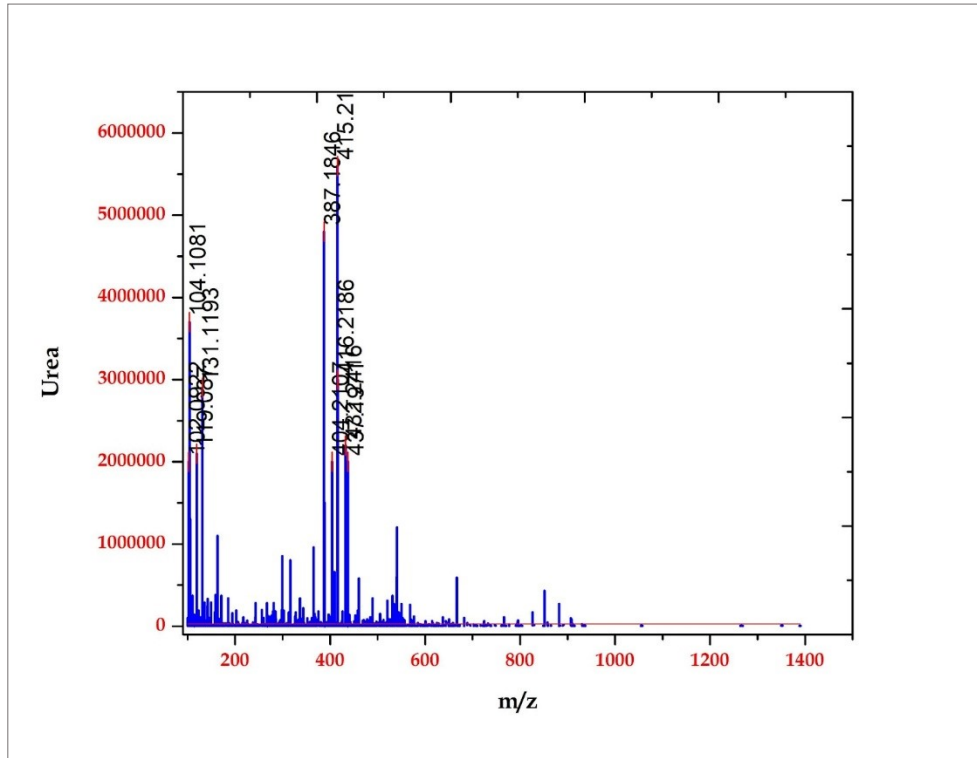

SF 3: TIC of an intra-cellular metabolite of plants treated with direct urea supply

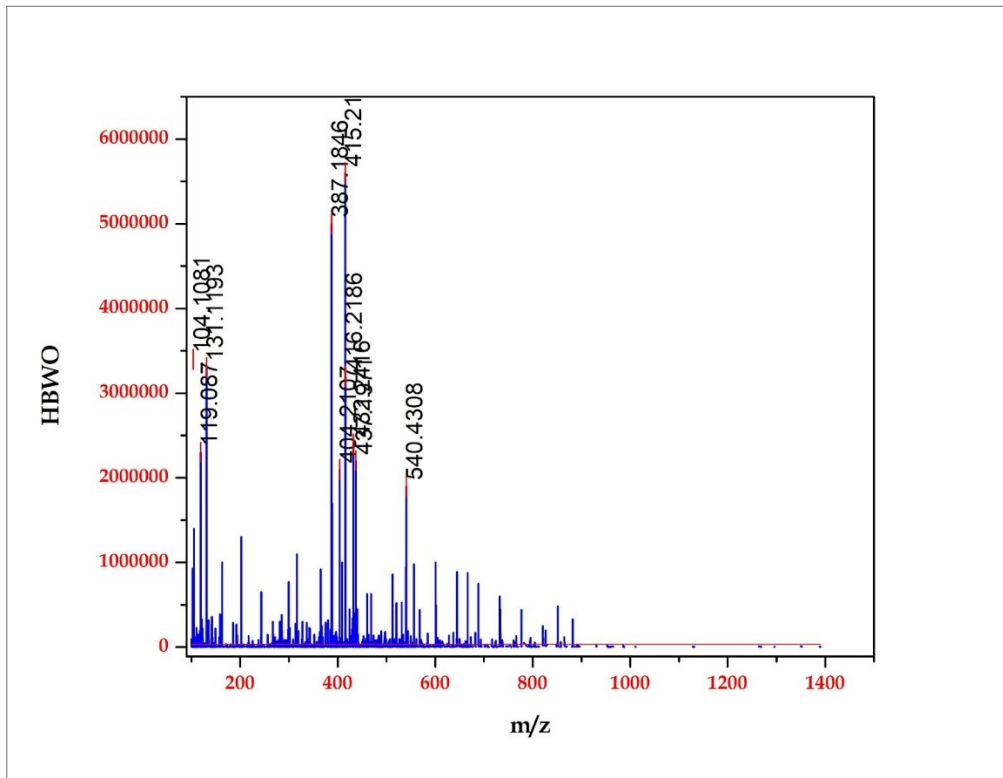

SF 4: TIC of an intra-cellular metabolite of plants treated with HBWU

Supplementary Data File

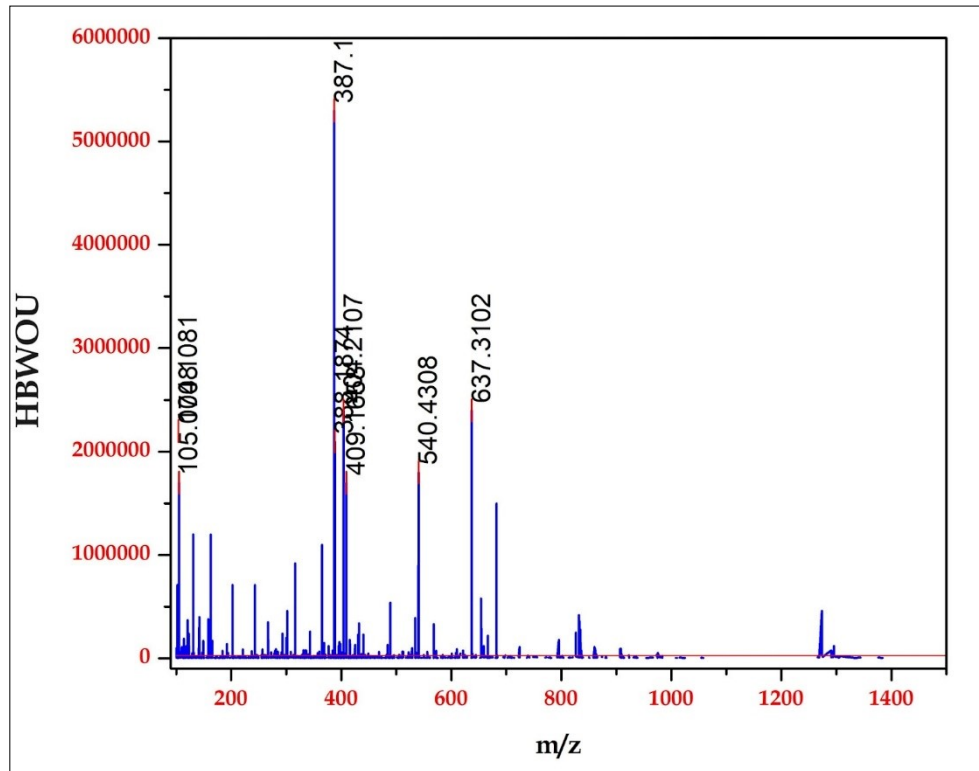

SF 5: TIC of an intra-cellular metabolite of plants treated with HBWOU

# Supplementary Data File

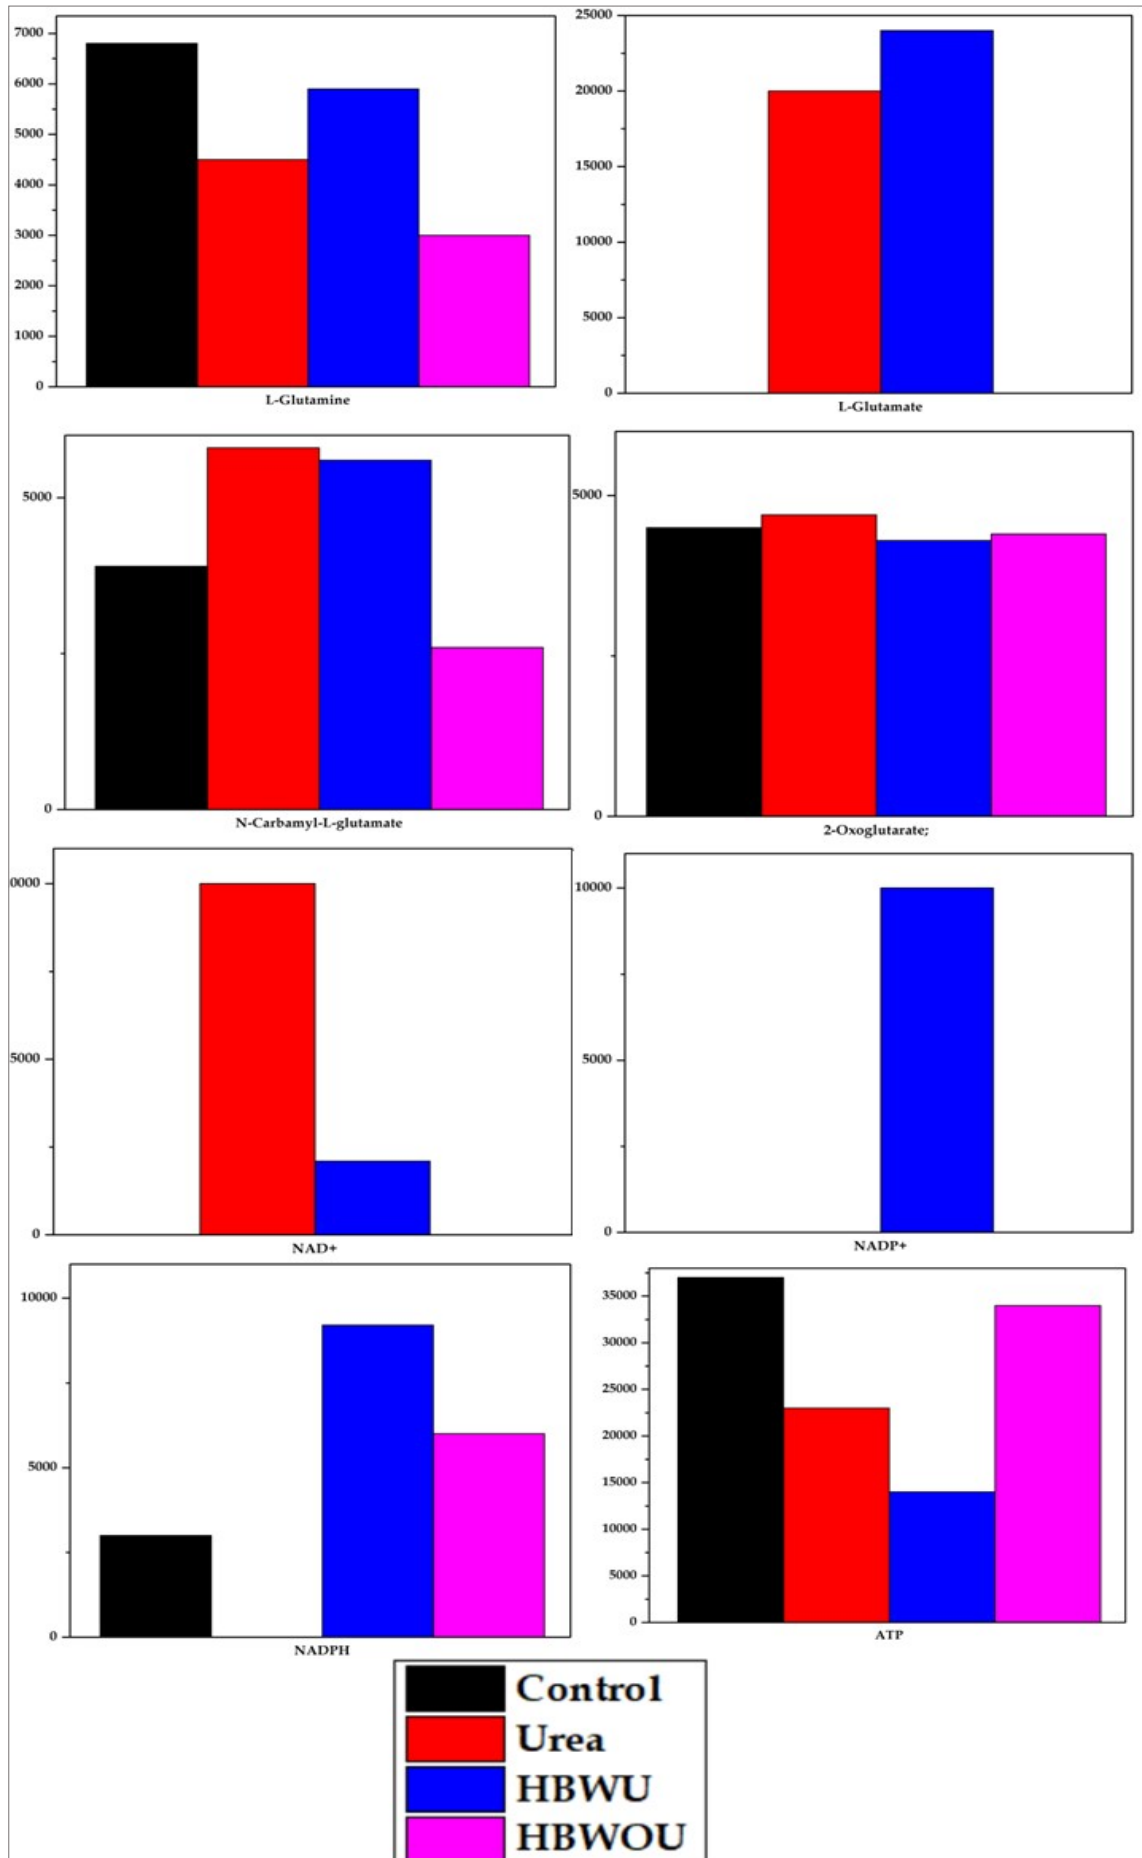

## Supplementary Data File

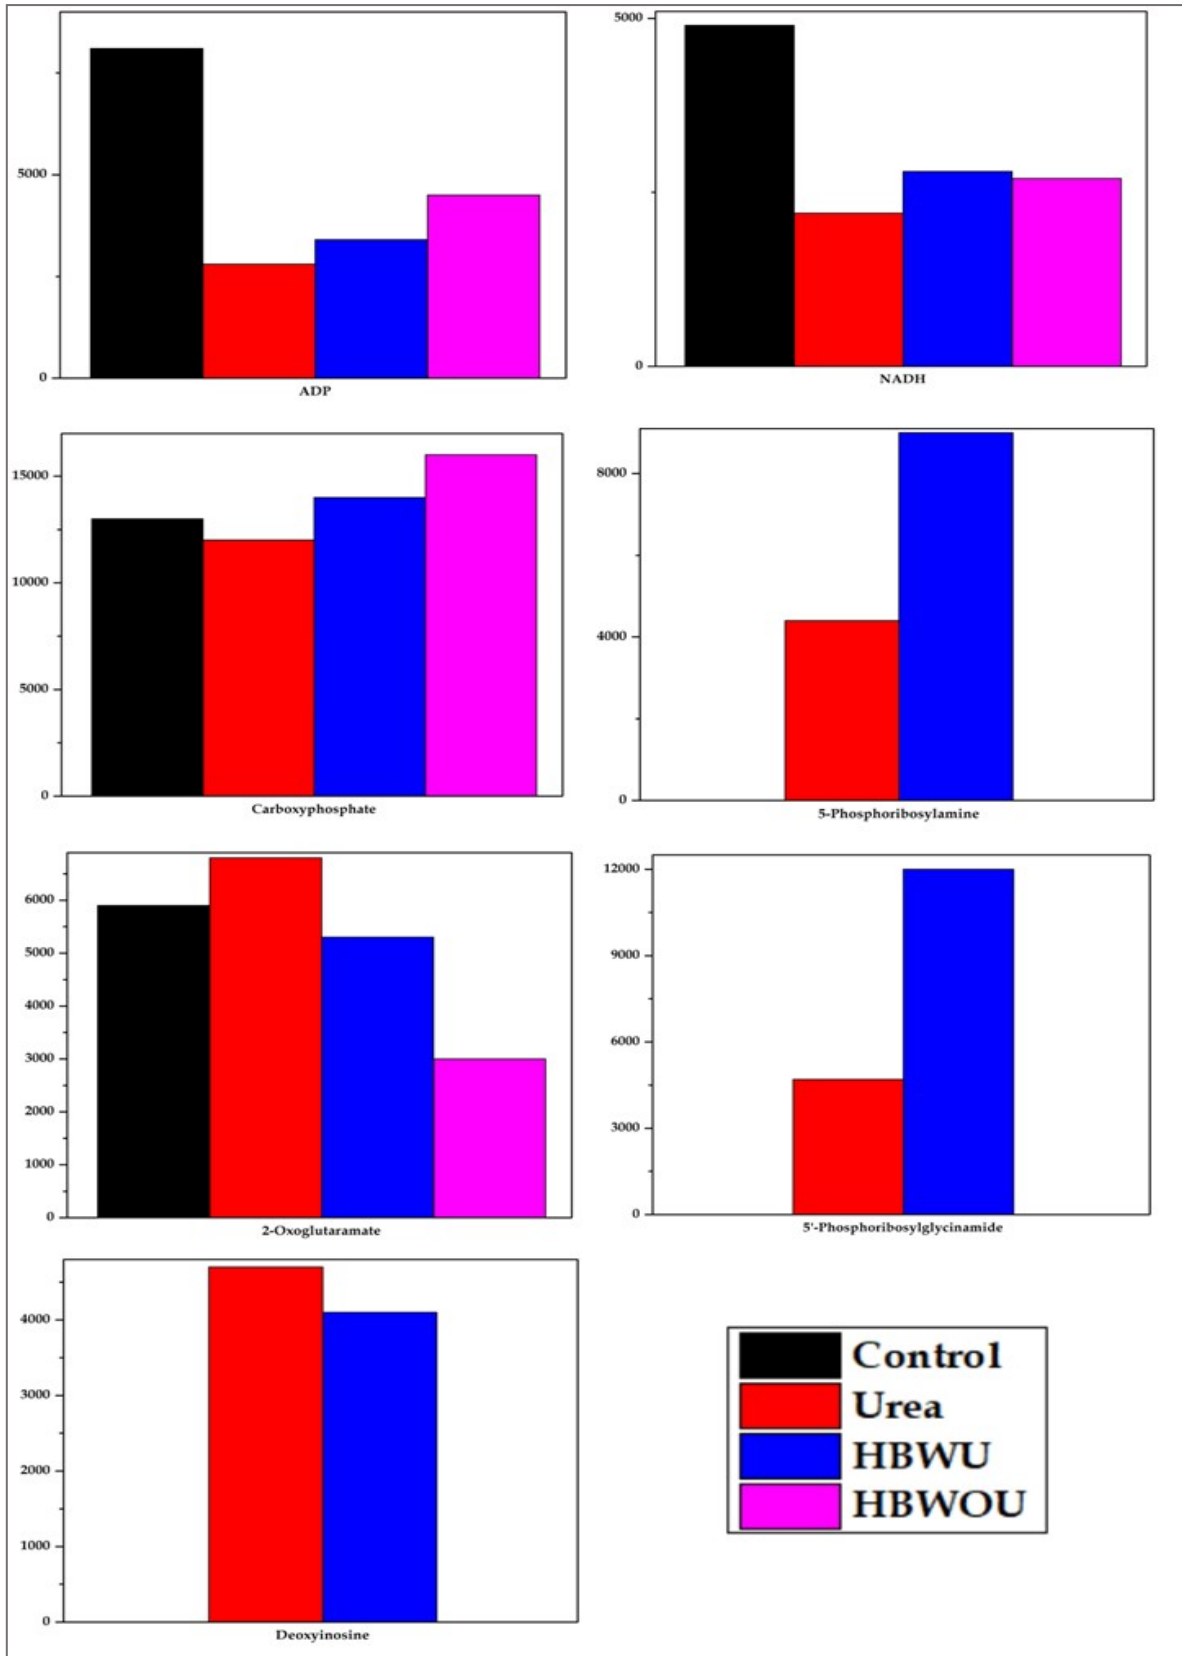

**SF 6: Relative abundance of up-regulated and down-regulated intra-cellular metabolites of control, urea, HBWU, and HBWOU-treated plants**
