# Supplementary figures and images for: Unraveling the phenotypic and metabolic responses induced by urea-encapsulated hydrogel beads on Brassica juncea (L.) Czern & Coss
Source: Royal Society of Chemistry journal article supplement (doi:10.1039/d4mo00192c), 2025-01-28

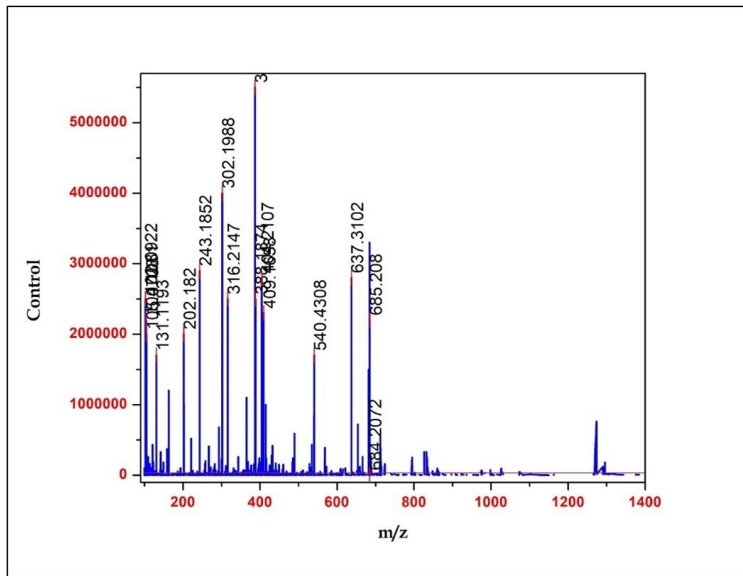

Supplement: d4mo00192c2.pdf [file d4mo00192c2.pdf]

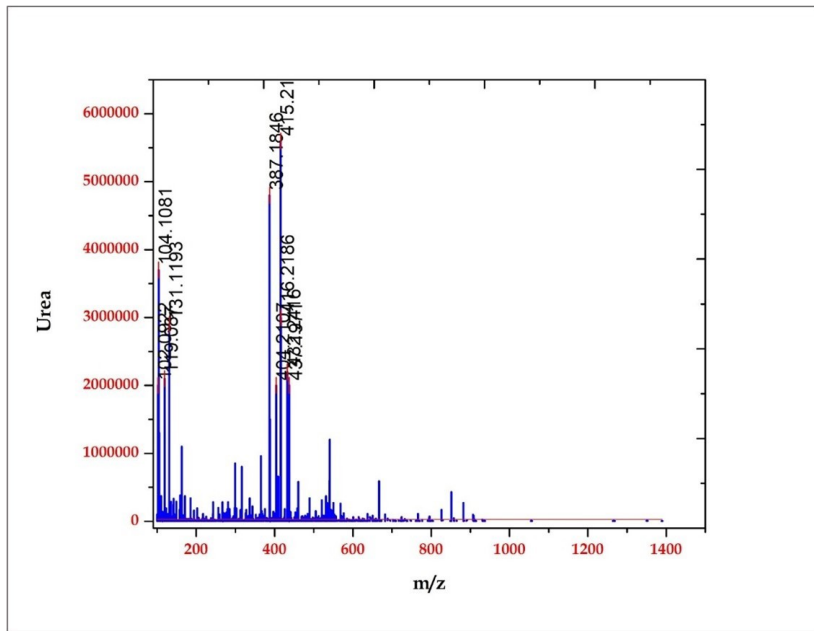

Supplement: d4mo00192c3.pdf [file d4mo00192c3.pdf]

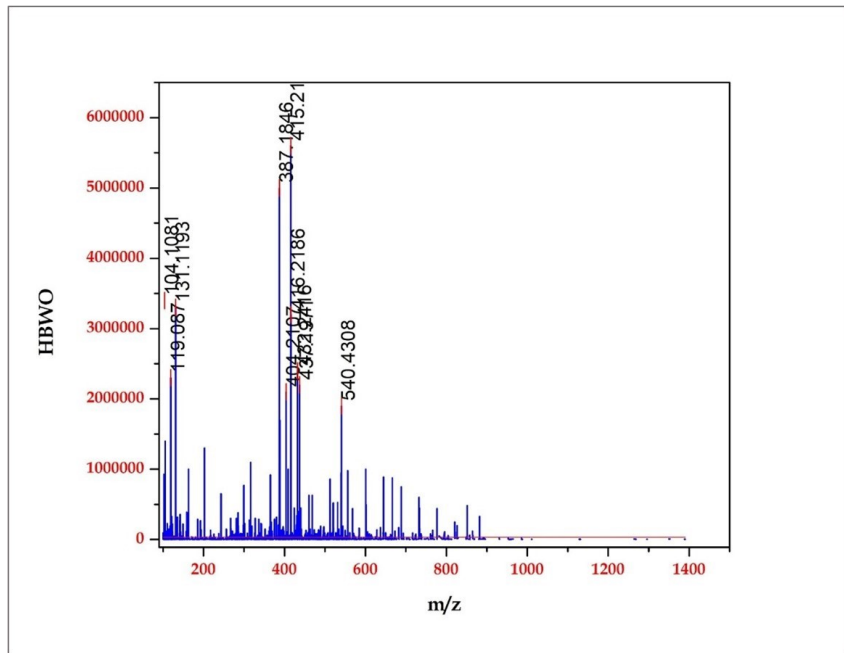

Supplement: d4mo00192c4.pdf [file d4mo00192c4.pdf]

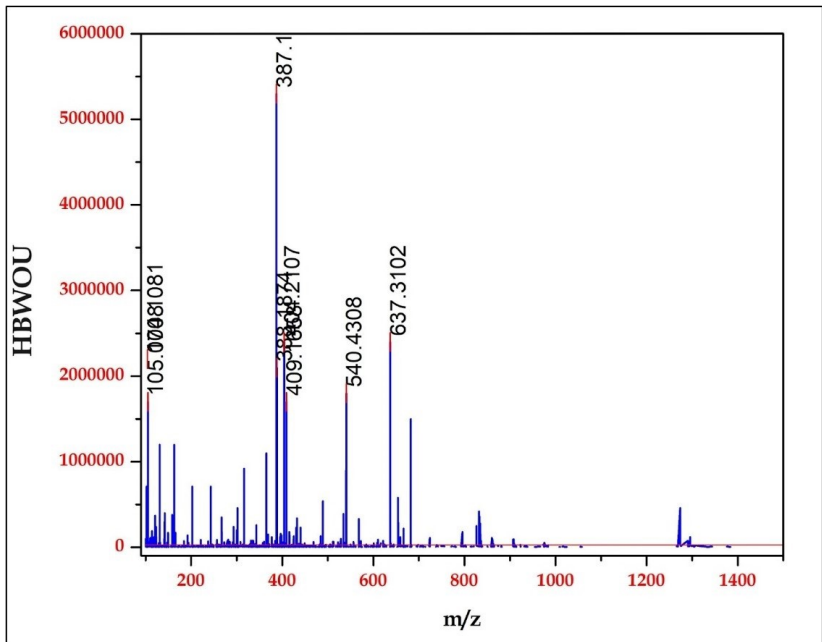

Supplement: d4mo00192c5.pdf [file d4mo00192c5.pdf]

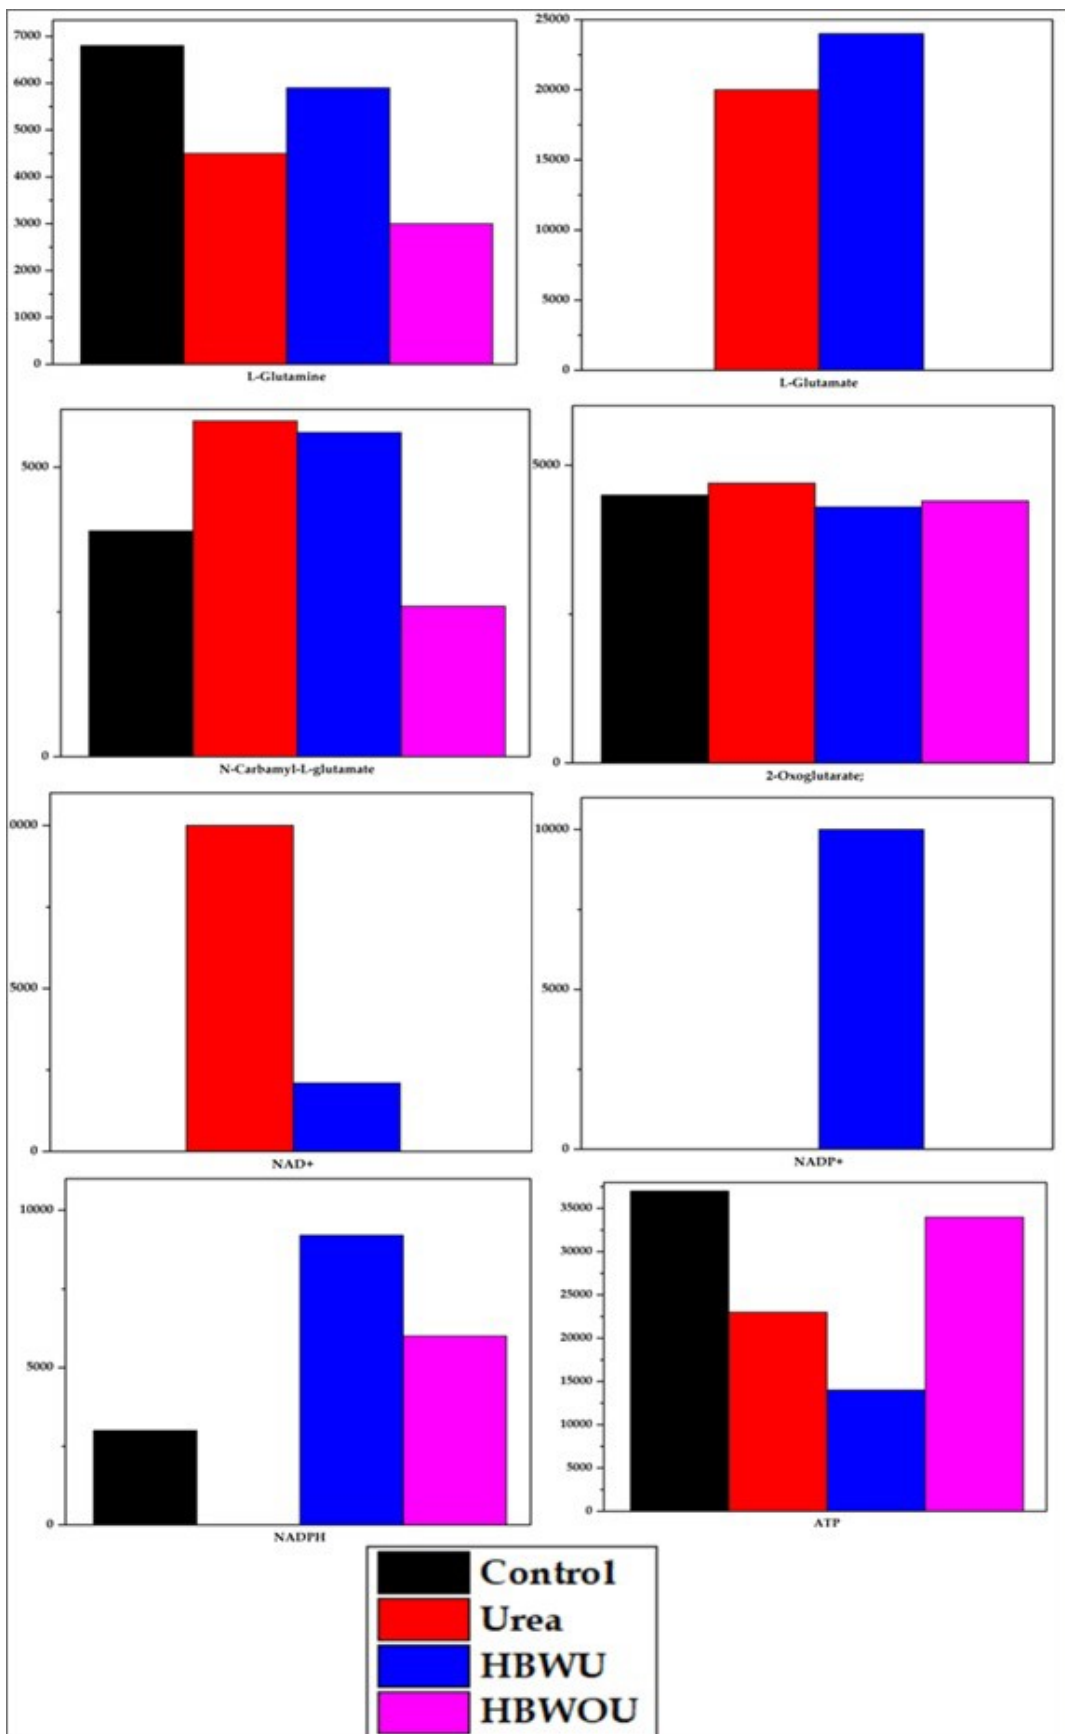

Supplement: d4mo00192c6.pdf [file d4mo00192c6.pdf]

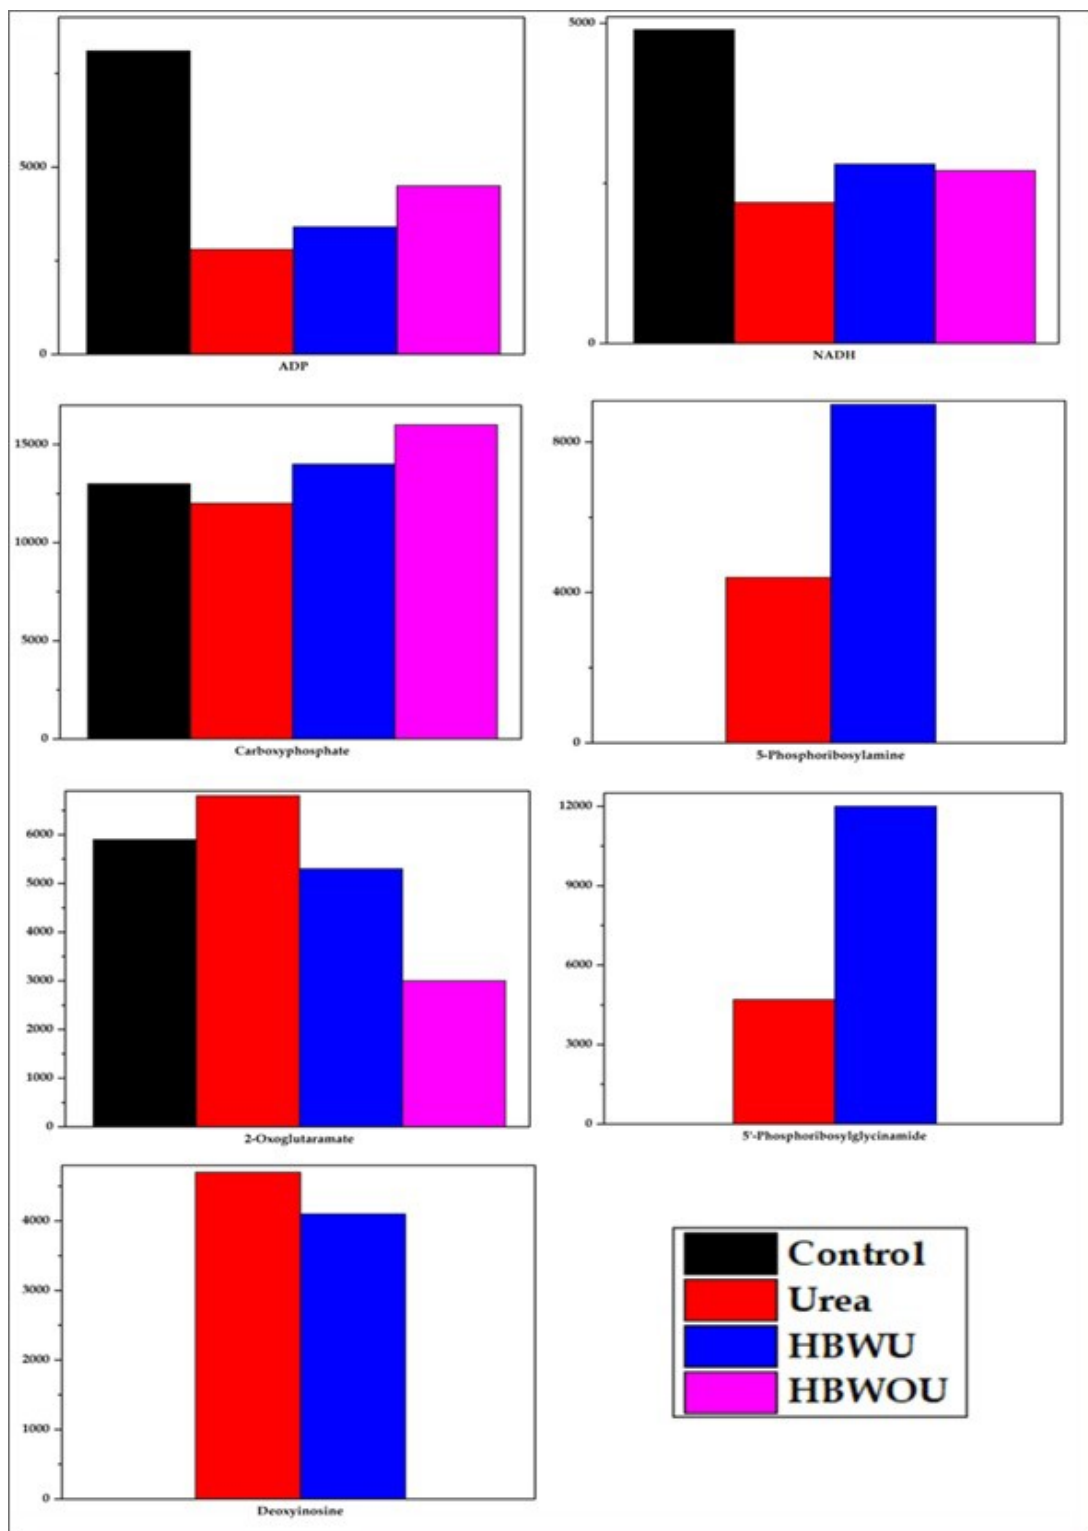

Supplement: d4mo00192c7.pdf [file d4mo00192c7.pdf]
